# Supplementary material
Source: Springer Nature journal article supplement (https://www.springermedizin.de/resource/supplementary/12904_2013_168_MOESM1_ESM.pdf/9517682)
Supplement: MOESM1 [file 9517682]

1633 Titles read  
Following removal of duplicates

- Reason for Exclusion
- Research with death as an outcome measure (306)
  - Palliative treatments for musculoskeletal disease (302)
  - Chronic pain and/or Cox 2 inhibitor (240)
  - Clear musculoskeletal focus but not EoL (202)
  - Terminal indicating computer terminal (90)
  - Other, wide ranging but primarily lists, opinion papers, diseases specific papers that highlighted pain and death as outcomes

73 Abstracts read

- Reason for Exclusion
- Pain and death separate issues in abstract (23)
  - Focus on Mortality (21)
  - Non relevant case study/series (9)
  - Other (9)

11 Papers read

- Reason for Exclusion
- Case studies that mentioned pain in the context of death but had no additional information about treatment or its relationship to outcome (4)
  - Case Series, no focus on pain (1)
  - Focus on proxy reporting (1)

5 Papers included + 1 from Internurse
